# Supplementary material for: Freiheitsentziehende Maßnahmen in bayerischen Heimeinrichtungen für Kinder, Jugendliche und junge Volljährige mit Intelligenzminderung
Source: Atypon-hosted journal article supplement (doi:10.1024/1422-4917/a000808), 2021-07-01
Supplement: 1422-4917_a000808_esm1.pdf [file 1422-4917_a000808_esm1.pdf]

***Forschungsprojekt: Reduktion von freiheitsentziehenden Maßnahmen bei Kindern und Jugendlichen mit geistiger Behinderung: Grundlagen einer interdisziplinären Allianz (REDUGIA)***

**Fragebogen an alle stationären Einrichtungen für Kinder und Jugendliche mit geistiger Behinderung in Bayern**

*Alle Auswertungen erfolgen pseudonymisiert und über alle teilnehmenden Einrichtungen hinweg. Bitte füllen Sie den Fragebogen sorgfältig aus. Wenn möglich, greifen Sie bitte auf interne Dokumentationen und Statistiken zurück.*

**TEIL A) Rahmenbedingungen der Einrichtung**

Bitte nennen Sie möglichst verlässliche Zahlen und Angaben.

1. Wie viele (Wohn-)Gruppen hat Ihre Einrichtung? \_\_\_\_\_
2. Wie viele davon sind Intensivgruppen (o.ä.)? \_\_\_\_\_
3. Falls Intensivgruppen existieren:  
Wie viele Kinder und Jugendliche leben in Intensivgruppen? \_\_\_\_\_
4. Wie viele Kinder und Jugendliche leben aktuell insgesamt in Ihrer Einrichtung? \_\_\_\_\_
5. Wie viele Kinder und Jugendliche in Ihrer Einrichtung haben einen richterlichen Unterbringungsbeschluss (§ 1631b BGB)? \_\_\_\_\_
6. Bei wie vielen Kindern und Jugendlichen in Ihrer Einrichtung bestehen Vereinbarungen mit den Eltern bezüglich der Anwendung von freiheitsentziehenden Maßnahmen (FeM)? \_\_\_\_\_
7. Gibt es in Ihrer Einrichtung einen explizit geschlossenen Bereich?  
☐ Ja  
☐ Nein  
Falls ja, wie viele Plätze sind geschlossen? \_\_\_\_\_
8. Werden die Türen der einzelnen Gruppen grundsätzlich abgeschlossen?  
(z.B. um Weglaufen der Kinder und Jugendlichen zu verhindern)  
☐ Ja, bei allen  
☐ Ja, bei \_\_\_\_\_ (Anzahl Gruppen)  
☐ Nein  
Falls ja: Sind die Türen auch von außen zugesperrt?  
☐ Ja  
☐ Nein  
Falls nein: Wird dies zwar nicht grundsätzlich, aber in Ausnahmefällen gemacht?  
☐ Ja  
☐ Nein
9. Wie viele Time-out Räume (o.ä.) gibt es in Ihrer Einrichtung? \_\_\_\_\_

CODE: xxxx

10. In welchem Turnus finden Schulungen für Mitarbeiter\*innen zum Umgang mit herausforderndem Verhalten und zum Thema Freiheitsentzug statt?  
(z.B. Deeskalation, Fixiertrainings o.ä.)
- ☐ einmal pro viertel Jahr
  - ☐ einmal pro Halbjahr
  - ☐ einmal pro Jahr
  - ☐ einmal nach Beginn des Arbeitsverhältnisses
  - ☐ unregelmäßig
  - ☐ nie
11. Sind die Schulungen für die Mitarbeiter\*innen
- ☐ freiwillig?
  - ☐ verpflichtend?
12. Wird ein spezielles Deeskalationsprogramm angewandt (z.B. TRIAS, ProDeMa)?  
Wenn ja, bitte nennen: \_\_\_\_\_
13. Gibt es schriftliche Verfahrensanweisungen/SOPs/Standardarbeitsanweisungen o.a. in Bezug auf freiheitsentziehende Maßnahmen in Ihrer Einrichtung?
- ☐ Ja
  - ☐ Nein

## TEIL B) Fragen zu herausforderndem Verhalten der Kinder und Jugendlichen

Herausforderndes Verhalten kann sich auf verschiedene Art und Weise zeigen. Manche Kinder und Jugendlichen verletzen sich selbst, andere und/oder Gegenstände, manche schreien exzessiv, andere verweigern jegliche Kooperation. Im Folgenden werden einige Verhaltensweisen genannt, die möglicherweise bei Kindern und Jugendlichen in Ihrer Einrichtung vorkommen.

**Mehrfachnennungen sind möglich**, beispielsweise für den Fall, dass ein Kind mehrere Verhaltensweisen aufweist.

Bitte geben Sie zur Beantwortung der Fragen **absolute Zahlen** an. Im Zweifel, schätzen Sie. Bitte beziehen Sie Ihre Angaben auf die **letzten zwei Wochen**.

Wie viele Kinder und Jugendliche in Ihrer Einrichtung...

- |                                                                                   |       |
|-----------------------------------------------------------------------------------|-------|
| 14. ... zeigen herausforderndes Verhalten in schwerer Ausprägung?                 | _____ |
| 15. ... zeigen stereotype Verhaltensweisen?                                       | _____ |
| 16. ... zeigen exzessives Schreien oder Lautieren?                                | _____ |
| 17. ... zeigen selbstverletzende Verhaltensweisen?                                | _____ |
| 18. ... zeigen fremdaggressive Verhaltensweisen gegen andere Menschen?            | _____ |
| 19. ... zeigen sachaggressive Verhaltensweisen?                                   | _____ |
| 20. ... zeigen exzessive Bewegungsunruhe?                                         | _____ |
| 21. ... sind weglaufgefährdet?                                                    | _____ |
| 22. ... zeigen einen umgekehrten Schlaf-/Wachrhythmus?                            | _____ |
| 23. ... zeigen sonstige, bisher nicht genannte, herausfordernde Verhaltensweisen? | _____ |
| Wenn ja, bitte nennen: _____                                                      |       |

Bitte geben Sie eine möglichst **genaue Anzahl** an. Im Zweifel, schätzen Sie.

Wie oft kam es in den **vergangen zwei Wochen** in Ihrer Einrichtung vor, dass...

- |                                                              |                 |
|--------------------------------------------------------------|-----------------|
| 24. ... ein Kind oder Jugendlicher sich selbst verletzt hat? | Genau _____ mal |
| 25. ... andere Kinder und Jugendliche verletzt wurden?       | Genau _____ mal |
| 26. ... Mitarbeiter*innen verletzt wurden?                   | Genau _____ mal |
| 27. ... Gegenstände o.ä. zerstört wurden?                    | Genau _____ mal |

CODE: xxxx

### Teil C) Fragen zur Belastung der Mitarbeiter\*innen

28. Wie viele Mitarbeiter\*innen (Stellen in Vollzeitäquivalenten) arbeiten in Ihrer Einrichtung insgesamt? \_\_\_\_\_  
(Anzahl)
29. Wie viele körperliche Angriffe/Übergriffe haben die Mitarbeiter\*innen Ihrer Einrichtung in den letzten zwei Wochen erlebt? \_\_\_\_\_  
(Anzahl)
30. Wie häufig innerhalb der letzten zwei Wochen haben die Mitarbeiter\*innen Ihrer Einrichtung Schutzkleidung (Protektoren, Schoner, Helm etc.) getragen? \_\_\_\_\_  
(Anzahl)
31. Wie viele Krankmeldungen gab es in Ihrer Einrichtung im Zusammenhang mit herausfordernden Verhaltensweisen der Kinder und Jugendlichen in den letzten 12 Monaten? \_\_\_\_\_  
(Anzahl)
32. Wie viele Versetzungsanträge, Kündigungen o.ä. gab es in Ihrer Einrichtung im Zusammenhang mit herausfordernden Verhaltensweisen der Kinder und Jugendlichen in den letzten 12 Monaten? \_\_\_\_\_  
(Anzahl)

### Teil D) Fragen zu Freiheitsentziehenden Maßnahmen (FeM)

Bitte nennen Sie möglichst konkrete und verlässliche Zahlen und Angaben. Falls Sie keine konkreten Zahlen verfügbar haben, schätzen Sie bitte. **Wir fragen immer nach der Anzahl der Kinder und der Anzahl der Maßnahmen separat, z.B. wenn ein Kind in den letzten zwei Wochen mehrfach eingeschlossen wurde.**

33. Bei wie vielen Kindern und Jugendlichen mussten **in den vergangenen zwei Wochen** normalerweise offene Türen verschlossen werden? \_\_\_\_\_  
Bei \_\_\_\_\_ Kindern u. Jugendlichen  
Wie **oft** kam dies in den vergangenen zwei Wochen vor? \_\_\_\_\_  
Insgesamt genau \_\_\_\_\_ mal  
(Beispiel: 4 Schließungen bei 3 Kindern, wobei eines 2x, zwei Kinder jew. 1x eingeschlossen wurden)
34. Wie viele Kinder und Jugendliche waren **in den vergangenen zwei Wochen** in einem verschlossenen Raum mit Sprossentüre? \_\_\_\_\_  
Kinder u. Jugendliche  
Wie **oft** kam dies in den vergangenen zwei Wochen vor? \_\_\_\_\_ mal
35. Wie viele Kinder und Jugendliche mussten **in den vergangenen zwei Wochen** in einen Raum (Time-out Raum, Zimmer, o.ä.) gebracht werden, der von innen nicht zu öffnen ist? \_\_\_\_\_  
Kinder u. Jugendliche  
Wie **oft** kam dies in den vergangenen zwei Wochen vor? \_\_\_\_\_ mal  
Wie **lange** befinden sich die Kinder und Jugendlichen im Schnitt in solchen Räumen? \_\_\_\_\_ Minuten.  
Sind die Kinder währenddessen unter Beobachtung?  
☐ ja, permanent und persönlich durch eine\*n Mitarbeiter\*in im Raum oder direkt davor  
☐ ja, ein\*e Mitarbeiter\*in schaut stichprobenartig in den Raum (ca. alle \_\_\_\_\_ Minuten)  
☐ ja, permanent per Videoüberwachung  
☐ ja, es wird stichprobenartig auf die Kamera geschaut (ca. alle \_\_\_\_\_ Minuten)  
☐ nein, es gibt eine fest vereinbarte Zeit, die das Kind oder die/der Jugendliche alleine im Raum bleibt  
☐ nein, das Kind oder die/der Jugendliche meldet sich, wenn es etwas braucht

CODE: xxxx

36. Gab es **in den vergangenen zwei Wochen** einen „Einschluss nach Tagesplan“ oder einen „routinemäßigen Einschluss“?
- ☐ Ja, bei \_\_\_\_\_ Kindern und Jugendlichen (genaue Anzahl)
- ☐ Nein
37. Bei wie vielen Kindern und Jugendlichen kam es **in den vergangenen zwei Wochen** vor, dass die Zimmertüre nachts verschlossen werden musste? Bei \_\_\_\_\_ Kindern u. Jugendlichen
- Wie **oft** kam es in den vergangenen zwei Wochen dazu? \_\_\_\_\_ mal
38. Bei wie vielen Kindern kam es **in den vergangenen zwei Wochen** zu Situationen, in denen sie mit körperlicher Kraft festgehalten werden mussten? Bei \_\_\_\_\_ Kindern u. Jugendlichen
- Wie oft kam es **in den vergangenen zwei Wochen** dazu? \_\_\_\_\_ mal
39. Wie viele Kinder und Jugendliche schlafen **regelmäßig** in Gitterbetten, Kayserbetten, Kastenbetten o.ä. \_\_\_\_\_ Kinder u. Jugendliche
40. Bei wie vielen Kindern und Jugendlichen darüber hinaus musste **in den vergangenen zwei Wochen** das Bett mit Gittern geschützt werden bzw. musste das Kind zum Schutz in einem anderen Bett schlafen? Bei \_\_\_\_\_ Kindern u. Jugendlichen
- Wie **oft** kam es in den vergangenen zwei Wochen dazu? \_\_\_\_\_ mal
41. Wie viele Kinder und Jugendliche mussten **in den vergangenen zwei Wochen** zu ihrem eigenen Schutz phasenweise Helme tragen? *(Nicht gemeint sind Kinder und Jugendliche, die aufgrund organischer Erkrankungen wie z.B. Epilepsie, einen Schutz tragen müssen.)* \_\_\_\_\_ Kinder u. Jugendliche
- Wie **oft** kam es in den vergangenen zwei Wochen dazu? \_\_\_\_\_ mal
42. Wie viele Kinder und Jugendliche mussten **in den vergangenen zwei Wochen** zu ihrem eigenen Schutz nicht abnehmbare Handschuhe tragen? \_\_\_\_\_ Kinder u. Jugendliche
- Wie **oft** kam es in den vergangenen zwei Wochen dazu? \_\_\_\_\_ mal
43. Wie viele Kinder und Jugendliche haben **in den vergangenen zwei Wochen** nicht (selbst-)abnehmbare Kleidung (verschließbare Anzüge, Bodies etc.) getragen? \_\_\_\_\_ Kinder u. Jugendliche
- Wie **oft** kam es in den vergangenen zwei Wochen dazu? \_\_\_\_\_ mal
44. Wie viele Kinder und Jugendliche haben **in den vergangenen zwei Wochen** Protektoren, Schienen o.ä. zum Schutz vor Selbstverletzung getragen? \_\_\_\_\_ Kinder u. Jugendliche
- Wie **oft** kam es in den vergangenen zwei Wochen dazu? \_\_\_\_\_ mal
45. Wie viele Kinder und Jugendliche waren **in den vergangenen zwei Wochen** auf einem sog. Fixierstuhl? \_\_\_\_\_ Kinder u. Jugendliche
- Wie **oft** kam es in den vergangenen zwei Wochen dazu? \_\_\_\_\_ mal
46. Wie viele Kinder und Jugendliche mussten **in den vergangenen zwei Wochen** im Bett oder auf einer speziellen Matratze fixiert werden? \_\_\_\_\_ Kinder u. Jugendliche
- Wie **oft** kam es in den vergangenen zwei Wochen dazu? \_\_\_\_\_ mal
47. Wie viele Kinder und Jugendliche in Ihrer Einrichtung erhalten fest angesetzte Psychopharmaka? \_\_\_\_\_ Kinder u. Jugendliche
48. Wie viele Kinder und Jugendliche mussten **in den vergangenen zwei Wochen** zur Beruhigung ungeplant mediziert werden („Bedarfsmedikation“)? \_\_\_\_\_ Kinder u. Jugendliche
- Wie **oft** kam es in den vergangenen zwei Wochen dazu? \_\_\_\_\_ mal
- Wie **oft** handelte es sich dabei um eine Zwangsmedikation, d.h. gegen den Willen des Kindes/Jugendlichen mittels körperlicher Gewalt? \_\_\_\_\_ mal

**Herzlichen Dank!**

CODE: xxxx
